# Supplementary material
Source: PubMed Central journal article supplement (PMC5004658)
Supplement: ASN.2015080867SupplementaryData.pdf [file ASN.2015080867SupplementaryData.pdf]

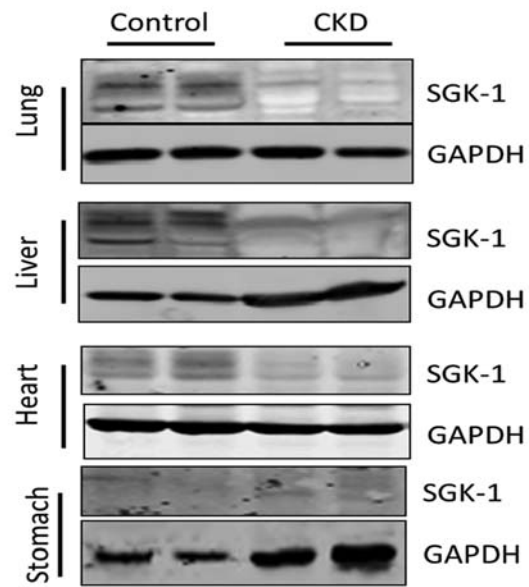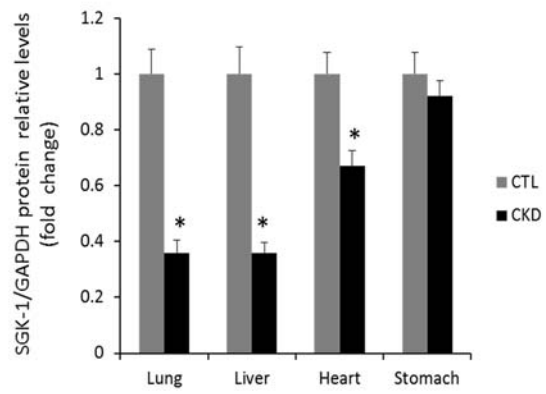

Supplemental figure 1.

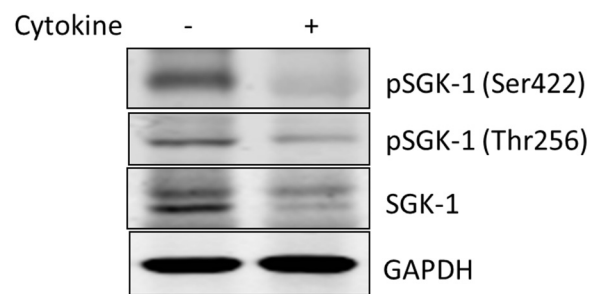

Supplemental figure 2

A

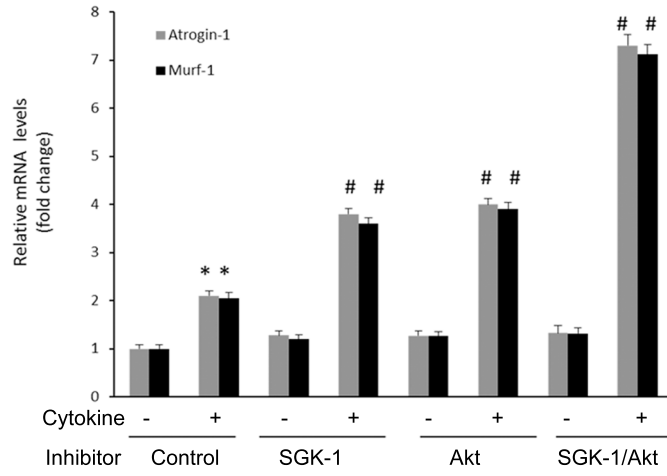

B

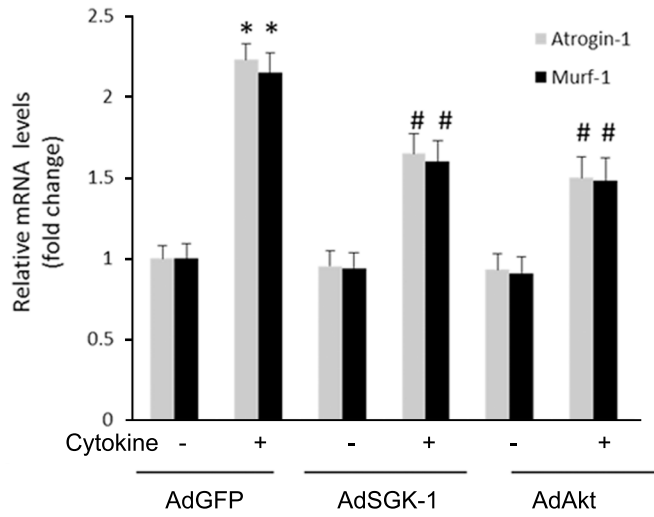

C

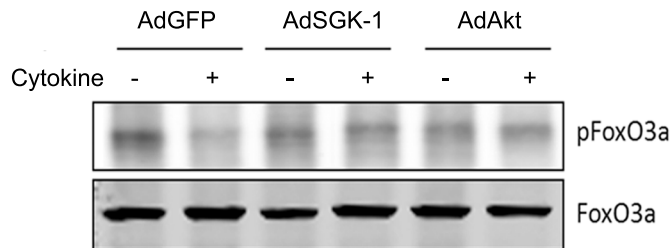

Supplemental figure 3.

**Supplemental figure 1. CKD suppresses SGK-1 expression in different tissues.**

Different tissues as indicated were collected from CKD mice, the SGK-1 expression were determined by Western blot (A) and the intensity analysis is summarized (B) (\*,  $p < 0.05$ ,  $n = 3$ ).

**Supplemental figure 2. Cytokines suppresses SGK-1 expression and activation.**

C2C12 cells were treated with the cocktail of cytokines for 24 h, the phosphorylated SGK-1 and the total levels were detected by Western blot.

**Supplemental figure 3. Comparing roles of Akt and SGK-1 in muscle wasting. A.**

C2C12 cells were treated with inhibitors of Akt (10  $\mu\text{M}$ ) and/or SGK-1 (50  $\mu\text{M}$ ) before exposing to cytokine mix for 24 hrs, the expression of Atrogin1 and Murf1 were determined by real time RT-PCR. B and C. C2C12 cells were treated with AdAkt and/or AdSGK-1 before exposing to cytokine mix for 24 hrs, the expression of Atrogin1 and Murf1 (B) and the phosphorylated FOXO3a were determined. ( $n = 3$  repeats).
